# Supplementary material
Source: PubMed Central journal article supplement (PMC4962632)
Supplement: IAI.00145-16_zii999091761so1.pdf [file IAI.00145-16_zii999091761so1.pdf]

**Supplementary Table 1: Associations between opsonizing antibodies and incidence of clinical disease during follow-up**

| Parasite strain | Unadjusted             |                  | Adjusted               |              |
|-----------------|------------------------|------------------|------------------------|--------------|
|                 | IRR (95% CI)           | <i>P</i>         | IRR (95% CI)           | <i>P</i>     |
| 3D7             | 0.69(0.45-1.05)        | 0.079            | 0.89(0.57-1.39)        | 0.618        |
| D10             | <b>0.67(0.46-0.99)</b> | <b>0.046</b>     | 0.74(0.49-1.10)        | 0.143        |
| K1              | <b>0.59(0.39-0.90)</b> | <b>0.014</b>     | 0.71(0.45-1.11)        | 0.131        |
| HB3             | <b>0.59(0.40-0.87)</b> | <b>0.008</b>     | 0.74(0.49-1.12)        | 0.165        |
| E8B             | <b>0.63(0.42-0.93)</b> | <b>0.021</b>     | 0.71(0.47-1.07)        | 0.100        |
| P. ALTO         | <b>0.63(0.43-0.94)</b> | <b>0.025</b>     | 0.79(0.52-1.19)        | 0.261        |
| W2MEF           | <b>0.67(0.45-0.98)</b> | <b>0.043</b>     | 0.85(0.56-1.28)        | 0.439        |
| XHA_A           | <b>0.45(0.30-0.69)</b> | <b>&lt;0.001</b> | <b>0.52(0.34-0.80)</b> | <b>0.003</b> |
| XHA_B           | <b>0.56(0.38-0.82)</b> | <b>0.003</b>     | 0.69(0.46-1.02)        | 0.062        |
| XHA_C           | <b>0.55(0.37-0.83)</b> | <b>0.004</b>     | 0.67(0.44-1.04)        | 0.072        |
| XHA_D           | <b>0.49(0.32-0.73)</b> | <b>0.001</b>     | <b>0.59(0.39-0.91)</b> | <b>0.016</b> |
| XHA_E           | <b>0.56(0.37-0.85)</b> | <b>0.007</b>     | <b>0.71(0.46-1.11)</b> | <b>0.136</b> |
| XHA_K           | <b>0.59(0.40-0.87)</b> | <b>0.008</b>     | <b>0.72(0.48-1.07)</b> | <b>0.103</b> |
| XHA_L           | <b>0.53(0.35-0.79)</b> | <b>0.002</b>     | <b>0.61(0.40-0.92)</b> | <b>0.018</b> |
| XHA_M           | <b>0.57(0.39-0.83)</b> | <b>0.004</b>     | 0.72(0.48-1.09)        | 0.118        |

**Note:** Phagocytosis responses from the entire cohort (n = 198) were stratified into 3 equal groups (tertiles): high, medium, and low antibody levels. Incidence Rate Ratios (IRRs) and 95 percent confidence intervals (95% CI) were calculated for all individuals (n = 198) by Poisson regression comparing high versus low tertiles and medium versus low responses with incidence of clinical malaria over the 6 month follow-up period; with only the results for high versus low comparisons shown. Unadjusted IRRs and IRRs adjusted for age and location (distance from coastline). Bold type indicates statistically significant associations.

**Supplementary Table 2: Associations between opsonizing antibodies and incidence of clinical disease during follow-up in children uninfected at baseline**

| Parasite strain | Unadjusted             |              | Adjusted               |              |
|-----------------|------------------------|--------------|------------------------|--------------|
|                 | IRR (95% CI)           | <i>P</i>     | IRR (95% CI)           | <i>P</i>     |
| 3D7             | <b>0.30(0.09-0.98)</b> | <b>0.047</b> | 0.48(0.14-1.70)        | 0.246        |
| D10             | <b>0.40(0.17-0.95)</b> | <b>0.037</b> | 0.49(0.20-1.20)        | 0.119        |
| K1              | 0.49(0.19-1.25)        | 0.134        | 0.62(0.23-1.67)        | 0.345        |
| HB3             | <b>0.26(0.09-0.73)</b> | <b>0.010</b> | <b>0.32(0.11-0.96)</b> | <b>0.041</b> |
| E8B             | <b>0.15(0.04-0.64)</b> | <b>0.010</b> | <b>0.18(0.04-0.74)</b> | <b>0.18</b>  |
| P. ALTO         | <b>0.07(0.01-0.48)</b> | <b>0.007</b> | <b>0.08(0.01-0.59)</b> | <b>0.013</b> |
| W2MEF           | <b>0.17(0.01-48)</b>   | <b>0.013</b> | <b>0.21(0.05-0.91)</b> | <b>0.037</b> |
| XHA_A           | <b>0.12(0.03-0.50)</b> | <b>0.003</b> | <b>0.14(0.03-0.59)</b> | <b>0.007</b> |
| XHA_B           | <b>0.18(0.06-0.59)</b> | <b>0.005</b> | <b>0.23(0.07-0.75)</b> | <b>0.015</b> |
| XHA_C           | <b>0.29(0.10-0.81)</b> | <b>0.018</b> | 0.38(0.13-1.12)        | 0.080        |
| XHA_D           | <b>0.17(0.04-0.71)</b> | <b>0.015</b> | <b>0.22(0.05-0.95)</b> | <b>0.042</b> |
| XHA_E           | <b>0.17(0.05-0.54)</b> | <b>0.003</b> | <b>0.19(0.05-0.95)</b> | <b>0.042</b> |
| XHA_K           | <b>0.26(0.09-0.73)</b> | <b>0.010</b> | <b>0.31(0.11-0.89)</b> | <b>0.029</b> |
| XHA_L           | <b>0.16(0.05-0.52)</b> | <b>0.002</b> | <b>0.19(0.06-0.65)</b> | <b>0.008</b> |
| XHA_M           | <b>0.46(0.23-0.92)</b> | <b>0.029</b> | 0.51(0.24-1.07)        | 0.074        |

**Note:** Phagocytosis responses from the entire cohort (n = 198) were stratified into 3 equal groups (tertiles): high, medium, and low antibody levels. Incidence Rate Ratios (IRRs) and 95 percent confidence intervals (95% CI) were calculated for individuals uninfected with *P. falciparum* at baseline (n = 64) by Poisson regression comparing high versus low tertiles and medium versus low responses with incidence of clinical malaria over the 6 month follow-up period; with only the results for high versus low comparisons shown. Unadjusted IRRs and IRRs adjusted for age and location (distance from coastline). Bold type indicates statistically significant associations.

**Supplementary Table 3: Associations between opsonizing antibodies and incidence of clinical disease during follow-up in children infected at baseline**

| Parasite strain | Unadjusted             |              | Adjusted        |          |
|-----------------|------------------------|--------------|-----------------|----------|
|                 | IRR (95% CI)           | <i>P</i>     | IRR (95% CI)    | <i>P</i> |
| 3D7             | 0.91(0.53-1.59)        | 0.750        | 1.07(0.60-1.88) | 0.822    |
| D10             | 0.82(0.50-1.33)        | 0.414        | 0.77(0.46-1.29) | 0.321    |
| K1              | 0.72(0.42-1.20)        | 0.210        | 0.80(0.46-1.39) | 0.426    |
| HB3             | 0.77(0.47-1.28)        | 0.321        | 0.93(0.55-1.56) | 0.788    |
| E8B             | 0.89(0.54-1.47)        | 0.660        | 0.93(0.56-1.56) | 0.790    |
| P. ALTO         | 0.94(0.58-1.54)        | 0.806        | 1.07(0.65-1.77) | 0.786    |
| W2MEF           | 0.99(0.61-1.63)        | 0.990        | 1.21(0.72-2.02) | 0.475    |
| XHA_A           | <b>0.59(0.36-0.99)</b> | <b>0.045</b> | 0.66(0.40-1.09) | 0.106    |
| XHA_B           | 0.66(0.42-1.04)        | 0.074        | 0.77(0.48-1.23) | 0.270    |
| XHA_C           | 0.71(0.43-1.17)        | 0.176        | 0.80(0.47-1.34) | 0.391    |
| XHA_D           | <b>0.60(0.37-0.98)</b> | <b>0.040</b> | 0.69(0.42-1.14) | 0.148    |
| XHA_E           | 0.85(0.51-1.43)        | 0.539        | 1.05(0.61-1.81) | 0.867    |
| XHA_K           | 0.75(0.47-1.20)        | 0.230        | 0.86(0.53-1.39) | 0.535    |
| XHA_L           | 0.72(0.43-1.18)        | 0.190        | 0.70(0.42-1.17) | 0.175    |
| XHA_M           | 1.17(0.73-1.90)        | 0.520        | 1.05(0.62-1.79) | 0.856    |

**Note:** Phagocytosis responses from the entire cohort (n = 198) were stratified into 3 equal groups (tertiles): high, medium, and low antibody levels. Incidence Rate Ratios (IRRs) and 95 percent confidence intervals (95% CI) were calculated for individuals infected with *P. falciparum* at baseline (n = 134) by Poisson regression comparing high versus low tertiles and medium versus low responses with incidence of clinical malaria over the 6 month follow-up period; with only the results for high versus low comparisons shown. Unadjusted IRRs and IRRs adjusted for age and location (distance from coastline). Bold type indicates statistically significant associations

**Supplementary Table 4: Correlation between opsonizing antibodies and MSP1-19 antibodies**

| Parasite strain | <i>Spearman (R)</i> | <i>P</i>      |
|-----------------|---------------------|---------------|
| 3D7             | 0.64                | <b>0.0001</b> |
| D10             | 0.62                | <b>0.0001</b> |
| K1              | 0.64                | <b>0.0001</b> |
| HB3             | 0.75                | <b>0.0001</b> |
| E8B             | 0.62                | <b>0.0001</b> |
| P. ALTO         | 0.82                | <b>0.0001</b> |
| W2MEF           | 0.72                | <b>0.0001</b> |
| XHA_A           | 0.72                | <b>0.0001</b> |
| XHA_B           | 0.81                | <b>0.0001</b> |
| XHA_C           | 0.69                | <b>0.0001</b> |
| XHA_D           | 0.74                | <b>0.0001</b> |
| XHA_E           | 0.65                | <b>0.0001</b> |
| XHA_K           | 0.74                | <b>0.0001</b> |
| XHA_L           | 0.73                | <b>0.0001</b> |
| XHA_M           | 0.73                | <b>0.0001</b> |

Phagocytosis responses from the entire cohort (n=198) were correlated to MSP1-19 antibodies measured by ELISA as previously described in:

Wilson DW, Fowkes FJI, Gilson PR, Elliott SR, Tavul L, Michon P, Dabod E, Siba PM, Mueller I, Crabb BS, Beeson JG: **Quantifying the Importance of MSP1-19 as a Target of Growth-Inhibitory and Protective Antibodies against Plasmodium falciparum in Humans.** *PLoS ONE* 2011, **6**:e27705. (34).
